# Supplementary material for: Deep eutectic solvent-based dispersive liquid–liquid microextraction followed by smartphone digital image colorimetry for the determination of carbofuran in water samples
Source: Royal Society of Chemistry journal article supplement (doi:10.1039/d2ay01861f), 2022-12-26
Supplement: d2ay01861f1.pdf [file d2ay01861f1.pdf]

Supplementary material

**Deep eutectic solvent-based dispersive liquid-liquid microextraction  
followed by smartphone digital image colorimetry for the  
determination of carbofuran in water samples**

Luyao Zhao<sup>a, b</sup>, Min Wang<sup>a</sup>, Jiadong Wang<sup>c</sup>, Jing Wu<sup>b</sup>, Zhuoting Zhang<sup>a</sup>, Xu Jing<sup>a, b, \*</sup>,  
Xiaowen Wang<sup>a, \*</sup>

*<sup>a</sup> College of Food Science and Engineering, Shanxi Agricultural University, Taigu,  
Shanxi 030801, China*

*<sup>b</sup> Tianjin Key Laboratory of Food Science and Health, School of Medicine, Nankai  
University, Tianjin 300071, China*

*<sup>c</sup> School of Pharmaceutical Engineering, Xinyang Agriculture and Forestry University,  
Xinyang 46400, China*

\*Corresponding author:

Xu Jing, College of Food Science and Engineering, Shanxi Agricultural University,  
Shanxi 030801, China; E-mail: x.jing@vip.163.com.

Xiaowen Wang, College of Food Science and Engineering, Shanxi Agricultural  
University, Shanxi 030801, China; E-mail: wwxw11@163.com.

Number of pages: 4

Number of figures: 2

Number of table: 1

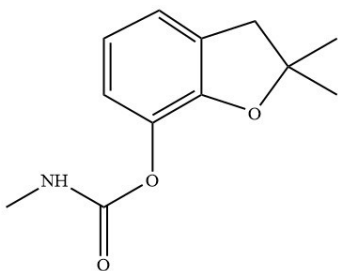

Carbofuran

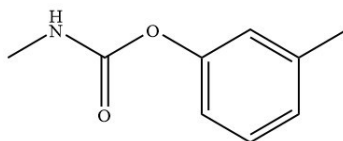

Metolcarb

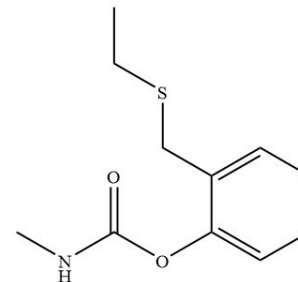

Ethiofencarb

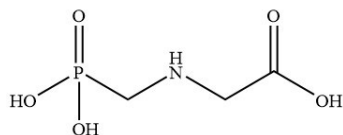

Glyphosate

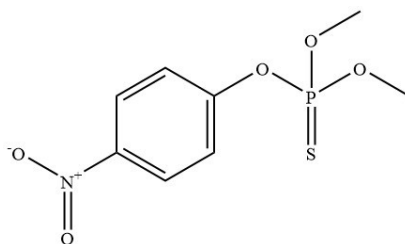

Parathion-methyl

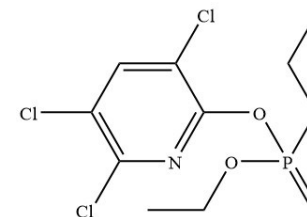

Chlorpyrifos

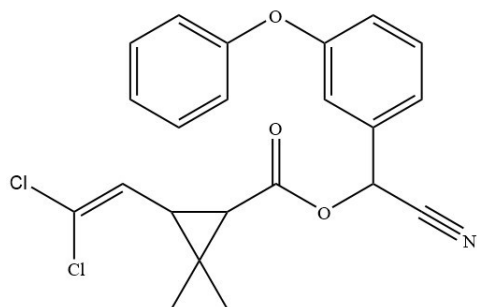

Beta-cypermethrin

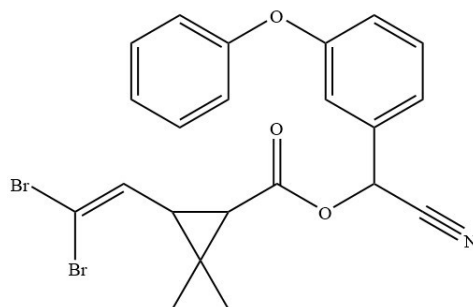

Deltamethrin

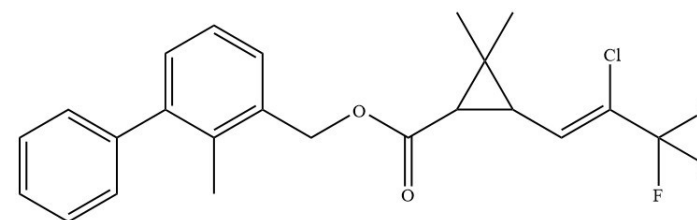

Bifenthrin

**Fig. S1.** The structures of carbamate (carbofuran, metolcarb, and ethiofencarb), organophosphorus (glyphosate, parathion-methyl, and chlorpyrifos), and pyrethroid insecticides (beta-cypermethrin, deltamethrin, and bifenthrin).

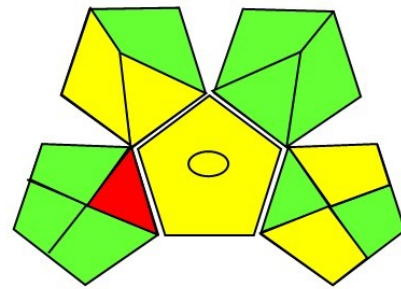

**Fig. S2.** GAPI assessment for CBF determination in a water sample.

**Table S1.** Penalty points for carbofuran determination in a water sample.

---

| Reagents               | Penalty points | Instruments         | Penalty points |
|------------------------|----------------|---------------------|----------------|
| Sodium carbonate 20 mg | 0              | Occupational hazard | 0              |
| Sodium chloride 200 mg | 0              | Waste               | 2              |
| FBBB 50 $\mu$ L        | 1              |                     |                |
| DES 50 $\mu$ L         | 0              |                     |                |
|                        | $\Sigma$ 1     |                     | $\Sigma$ 2     |

---

Total penalty points: 3

Analytical Eco-Scale total score: 97

---
